# Supplementary material for: Ultrafast population coding and axo-somatic compartmentalization
Source: PubMed Central journal article supplement (PMC8797191; doi:10.1371/journal.pcbi.1009775), 2022-01-18
Supplement: pcbi.1009775.s001.pdf [file pcbi.1009775.s001.pdf]

## Supporting figures

In S Fig 1, we compare the axonal and somatic AP waveforms for various AP initiation sites. These AP waveforms are generated with constant current of amplitudes that cause 5 Hz firing rate for all different values of  $x_{Na}$ . Axonal and somatic voltages are reset to resting potential when the voltage in the axon reaches 0 mV. Therefore, the peak voltage in the soma is smaller as  $x_{Na}$  increases.

The intrinsic AP initiation dynamics in the axon is more voltage sensitive when  $x_{Na}$  is larger, therefore the corresponding axonal AP waveform is slightly sharper. Seen at the soma, due to voltage decoupling, the somatic voltage rises more rapidly.

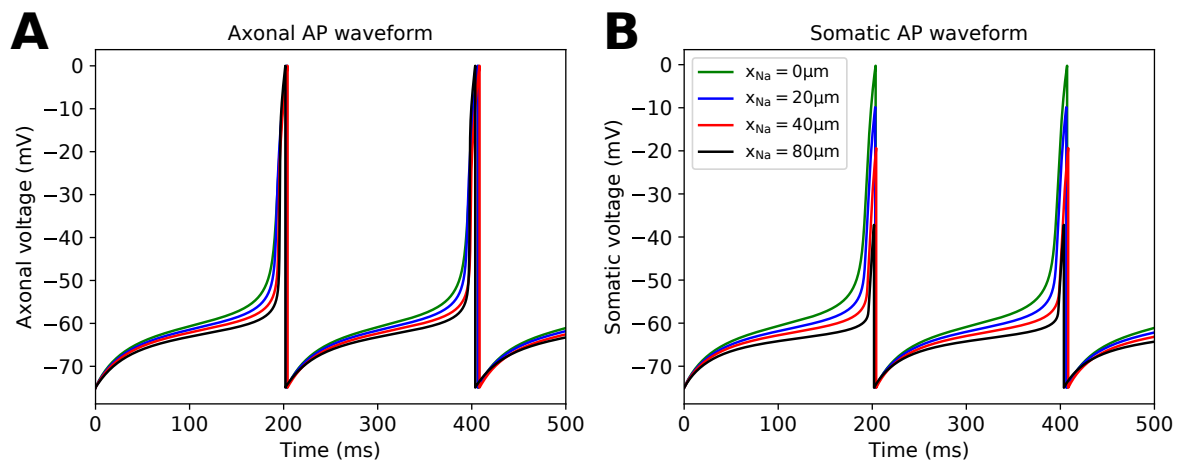

**Supplementary Figure 1: Axonal and somatic AP waveforms with various AP initiation sites.** AP waveforms are generated with constant inputs reproducing 5 Hz firing rate. Axonal and somatic voltages are reset to the resting potential when axonal voltages reach 0 mV.
