# Supplementary material for: Ultrafast population coding and axo-somatic compartmentalization
Source: PubMed Central journal article supplement (PMC8797191; doi:10.1371/journal.pcbi.1009775), 2022-01-18
Supplement: pcbi.1009775.s003.pdf [file pcbi.1009775.s003.pdf]

In S Fig 3, we also examined the impact of  $\tau$  on dynamic gain functions with more values. Increasing from 2 ms to 50 ms, the enhancement of dynamic gain at intermediate frequencies is larger when  $k_a$  is smaller.

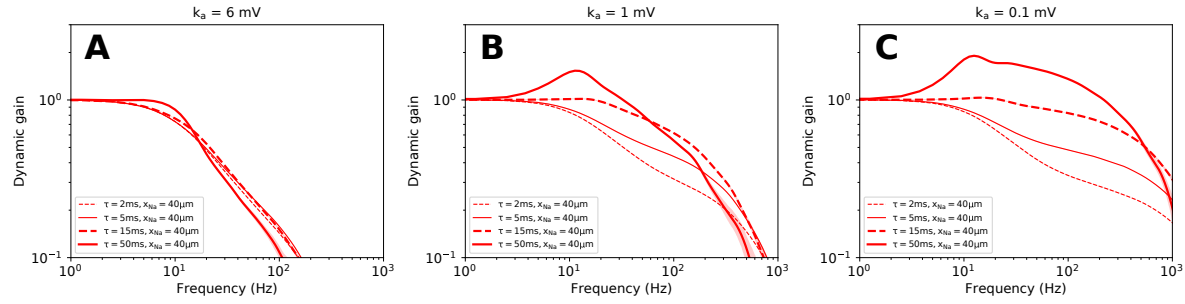

**Supplementary Figure 3: Brunel effect is larger when AP initiation dynamics is more voltage sensitive.**  $x_{Na}$  is fixed at  $40 \mu\text{m}$ .  $k_a$  is set to 6 mV, 1 mV and 0.1 mV in A, B and C respectively. Increasing  $\tau$  from 2 ms to 50 ms, the enhancement of dynamic gain in the high frequency region is larger when  $k_a$  is smaller. The same working point was used for all simulations ( $CV_{ISI} = 0.85$ ,  $\nu = 5$  Hz).
